# Supplementary material for: Intestinal Exposure to Ceftiofur and Cefquinome after Intramuscular Treatment and the Impact of Ceftiofur on the Pig Fecal Microbiome and Resistome
Source: MDPI journal article supplement (doi:10.3390/antibiotics11030342), 2022-03-04
Supplement: s1 [file s1]

Supplementary data

## **Intestinal exposure to ceftiofur and cefquinome after intramuscular treatment and the impact of ceftiofur on the pig faecal microbiome and resistome**

Sofie Rutjens<sup>1</sup>, Nick Vereecke<sup>2</sup>, Ward De Spiegelaere<sup>3</sup>, Siska Croubels<sup>1</sup>, and Mathias Devreese<sup>1,\*</sup>

<sup>1</sup> Department of Pathobiology, Pharmacology and Zoological Medicine, Faculty of Veterinary Medicine, Ghent University, 9820 Merelbeke, Belgium; Sofie.Rutjens@UGent.be, Siska.Croubels@UGent.be

<sup>2</sup> PathoSense BV, 2500 Lier, Belgium & Department of Translational Physiology, Infectiology and Public Health, Laboratory of Virology, Faculty of Veterinary Medicine, Ghent University, 9820 Merelbeke, Belgium; Nick.Vereecke@pathosense.com

<sup>3</sup> Department of Morphology, Imaging, Orthopedics, Rehabilitation and Nutrition, Faculty of Veterinary Medicine, Ghent University, 9820 Merelbeke, Belgium; Ward.DeSpiegelaere@UGent.be

\* Correspondence: Mathias.Devreese@UGent.be; Tel.: 0032 9 264 73 47

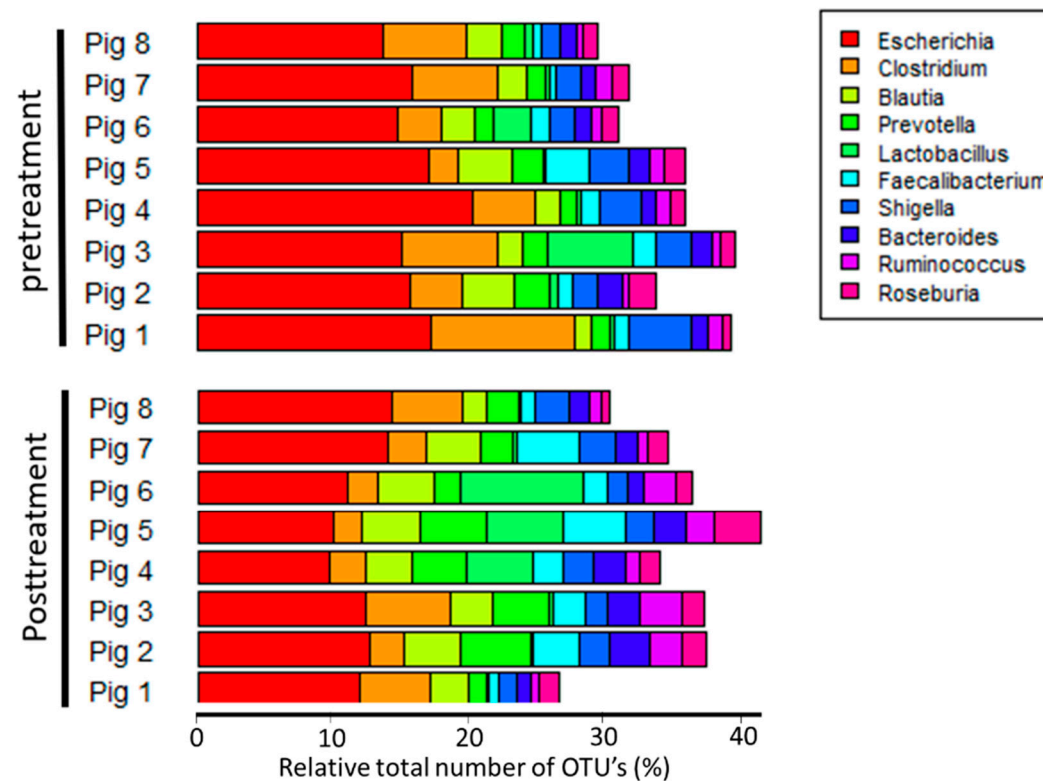

**Figure S1.** Genus level horizontal bar plot of the relative total number of OTU's of the top 10 genera. Faecal microbiomes for each animal (n=8) were analysed pre-treatment and 9 hours after the last dose of the daily intramuscular administration of 3 mg.kg<sup>-1</sup> body weight of ceftiofur for 3 consecutive days. Collection times and animal numbers are displayed on the side.

**Table S1.** Mean ( $\pm$  standard deviation, n=8) resistance gene counts corrected to the relative (pre-treatment to post-treatment, i.e. 9 hours after the last dose of the daily intramuscular administration of 3 mg.kg<sup>-1</sup> body weight of ceftiofur for 3 consecutive days) base counts of the top 20 genera. *Tet* = tetracycline, *AME* = aminoglycoside-modifying enzyme, *Van* = vancomycin, *CfxA* = beta-lactamase.

| Genus                     | Tet resistance genes |            | AME resistance genes |           | VAN resistance genes |           | Macrolide resistance genes |           | Lincosamide resistance genes |            | CfxA resistance genes |            |
|---------------------------|----------------------|------------|----------------------|-----------|----------------------|-----------|----------------------------|-----------|------------------------------|------------|-----------------------|------------|
|                           | Day 0                | Day 3      | Day 0                | Day 3     | Day 0                | Day 3     | Day 0                      | Day 3     | Day 0                        | Day 3      | Day 0                 | Day 3      |
| <i>Anaerobutyricum</i>    | 2.1 ± 2.1            | 2.2 ± 2.5  | 0.1 ± 0.4            | 0.1 ± 0.2 | 0                    | 0         | 0.4 ± 0.7                  | 0.1 ± 0.2 | 0.6 ± 1.2                    | 0          | 0                     | 0          |
| <i>Bacillus</i>           | 0                    | 0          | 0.3 ± 0.5            | 0.2 ± 0.5 | 0                    | 0         | 0                          | 0.3 ± 0.6 | 0.8 ± 2.1                    | 0          | 0                     | 0          |
| <i>Bacteroides</i>        | 8.3 ± 6.6            | 7.8 ± 6.6  | 0                    | 0         | 0                    | 0         | 9.5 ± 7.3                  | 5.9 ± 2.8 | 2.0 ± 4.7                    | 0.2 ± 0.4  | 4.7 ± 2.5             | 7.6 ± 6.4  |
| <i>Blautia</i>            | 0.5 ± 1.1            | 1.2 ± 1.1  | 0.3 ± 0.5            | 0.2 ± 0.4 | 0                    | 0         | 0                          | 0.1 ± 0.2 | 0.4 ± 0.5                    | 0.2 ± 0.5  | 0                     | 0          |
| <i>Clostridium</i>        | 6.8 ± 3.5            | 9.8 ± 7.9  | 0.6 ± 0.7            | 0*        | 0                    | 0         | 0.9 ± 1.0                  | 2.4 ± 3.5 | 0.6 ± 1.4                    | 2.8 ± 5.0  | 0                     | 0          |
| <i>Escherichia</i>        | 0                    | 0          | 0.1 ± 0.4            | 0.7 ± 1.0 | 0                    | 0         | 0.1 ± 0.4                  | 0.1 ± 0.4 | 0.6 ± 0.5                    | 0.7 ± 0.8  | 0                     | 0          |
| <i>Faecalibacterium</i>   | 7.8 ± 6.0            | 6.8 ± 3.9  | 0                    | 0.1 ± 0.2 | 0                    | 0         | 0.1 ± 0.4                  | 0         | 0.6 ± 0.7                    | 0.6 ± 0.5  | 0                     | 0          |
| <i>Lachnoclostridium</i>  | 1.9 ± 2.0            | 1.4 ± 1.0  | 0.1 ± 0.4            | 0.1 ± 0.3 | 0                    | 0         | 0.3 ± 0.5                  | 0.1 ± 0.3 | 0.1 ± 0.4                    | 0.2 ± 0.4  | 0                     | 0          |
| <i>Lactobacillus</i>      | 3.3 ± 4.8            | 9.7 ± 19.3 | 0                    | 0         | 0                    | 0         | 2.1 ± 4.8                  | 0.3 ± 0.6 | 5.0 ± 3.2                    | 7.9 ± 19.6 | 0                     | 0          |
| <i>Leishmania</i>         | 0                    | 0          | 0                    | 0         | 0                    | 0         | 0                          | 0         | 0                            | 0          | 0                     | 0          |
| <i>Methanobrevibacter</i> | 0                    | 0          | 0                    | 0         | 0                    | 0         | 0                          | 0         | 0                            | 0          | 0                     | 0          |
| <i>Oscillibacter</i>      | 1.4 ± 1.8            | 3.2 ± 3.8  | 0.1 ± 0.4            | 0         | 0                    | 0         | 0                          | 0         | 0.4 ± 0.5                    | 0          | 0                     | 0          |
| <i>Prevotella</i>         | 0                    | 0.1 ± 0.2  | 0                    | 0         | 0                    | 0         | 0                          | 0         | 0                            | 0          | 2.8 ± 2.0             | 0.7 ± 0.7* |
| <i>Romboutsia</i>         | 0.1 ± 0.4            | 0          | 0.1 ± 0.4            | 0         | 0                    | 0         | 0.3 ± 0.5                  | 0         | 0                            | 0          | 0                     | 0          |
| <i>Roseburia</i>          | 2.5 ± 2.2            | 3.2 ± 2.0  | 0.3 ± 0.7            | 0.2 ± 0.3 | 0                    | 0         | 0.8 ± 0.7                  | 0.9 ± 1.0 | 0.1 ± 0.4                    | 0.6 ± 0.9  | 0                     | 0          |
| <i>Ruminococcus</i>       | 0.5 ± 0.8            | 0.4 ± 0.8  | 0.3 ± 0.5            | 0         | 0                    | 0         | 0                          | 0.3 ± 0.6 | 0.2 ± 0.5                    | 0.2 ± 0.4  | 0                     | 0          |
| <i>Salmonella</i>         | 0                    | 0          | 0.5 ± 0.5            | 0.1 ± 0.3 | 0                    | 0         | 0                          | 0         | 0                            | 0          | 0                     | 0          |
| <i>Shigella</i>           | 0                    | 0          | 0                    | 0         | 0                    | 0         | 0                          | 0         | 0.6 ± 1.4                    | 0          | 0                     | 0          |
| <i>Streptococcus</i>      | 7.9 ± 5.7            | 13.3 ± 7.0 | 0.3 ± 0.5            | 0.1 ± 0.2 | 1.6 ± 1.6            | 1.2 ± 1.4 | 0.3 ± 0.7                  | 0.5 ± 0.5 | 2.5 ± 3.3                    | 1.5 ± 1.3  | 0                     | 0          |
| <i>Treponema</i>          | 0.1 ± 0.4            | 0          | 0                    | 0         | 0                    | 0         | 0                          | 0         | 0.8 ± 1.2                    | 0.6 ± 1.6  | 0                     | 0          |

Significance codes: '\*'  $p$ -value <0.05
